# Supplementary material for: Nitrogen recycling from the xylem in rice leaves: dependence upon metabolism and associated changes in xylem hydraulics
Source: PubMed Central journal article supplement (PMC4861031; doi:10.1093/jxb/erw132), 2016-04-06
Supplement: supp_erw132_supplementary_figures_S1_S2_tables_S1_S7.pdf [file supp_erw132_supplementary_figures_S1_S2_tables_S1_S7.pdf]

# Nitrogen Recycling from the Xylem in Rice Leaves: Dependence upon Metabolism and Associated Changes in Xylem Hydraulics

Karen J Bailey and Richard C Leegood

## Antibodies used in Western Immunoblotting and Immunolocalisation

All antibodies except for PEPC (derived from purified *Amaranthus edulis L.* protein) (Dever *et al.* 1995) and PEPCCK (derived from purified *Cucumis sativus L.* protein) (Walker *et al.* 1995) were affinity purified and derived from peptides designed to specific sequences in the corresponding enzymes in rice. Two peptide antibodies were designed to the two isoforms of PEPCCK in rice, chromosome 3 and chromosome 10 isoforms. Each antibody specifically detected either the chromosome 3 isoform or the chromosome 10 isoform. The peptide antibody to the chromosome 3 isoform of PEPCCK specifically detected this isoform due to the targeting of a string of amino acids present only in the longer chromosome 3 protein. The affinity purified antibodies by nature of the affinity purification elution process were more dilute in their final form compared to the PEPC and *Cucumis sativus*. PEPCCK final form antibodies.

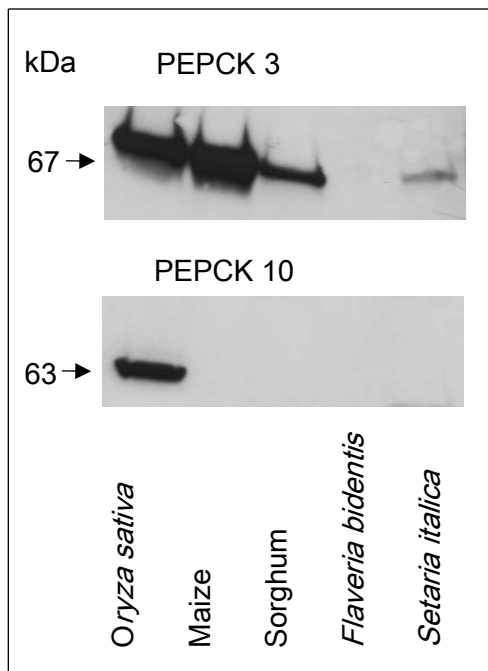

**Supplementary Fig. S1.** Immunoblot showing the difference in specificity between the peptide antibodies of rice specific to the chromosome 3 and the chromosome 10 isoform of PEPCCK. The fifth leaf of 42-d-old plants were used except for *S. italica* and *F. bidentis* in which case 14-d-old leaves were used. Loadings on the gel contained the soluble protein

content of 2.0 mg of FW of tissue. For specificity of *Cucumis sativus L.* PEPCK please see Walker *et al.* (1995).

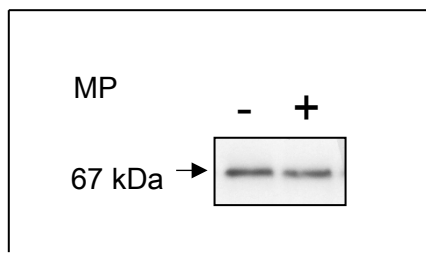

**Supplementary Fig. S2.** Immunoblot showing the effect of 3-mercaptopicolinic acid on the abundance of the PEPCK 3 protein in 7-d-old first leaves of *O. sativa* plants fed for 24 hours. Control plants were fed with water. Treated plants were fed with water containing 350 mM MPA. Loadings on gels contained the soluble protein content of 1 mg of FW of tissue.

---

**Supplementary Table S1.** *Primers used for gene expression.*

*Sequences of primers used for relative gene expression experiment described in Figure 3. Target genes GDUI, ASPARAGINASE, GS, PEPCK3, PEPCK10 and NADP-ME were normalised to the small nucleolar RNA associated with protein 11 (SnU3-RNA).*

---

| Gene                | Chromosome | Forward Primer           | Reverse Primer           |
|---------------------|------------|--------------------------|--------------------------|
| <i>SnU3-RNA</i>     | Os01g59500 | ACATGGCCTTGCAGAAAGAGTTG  | GCCATTCACATCATCGCTTCCG   |
| <i>GDUI</i>         | Os08g34700 | TTGTGGAACACAGAACGCACAG   | TTTGGCGGCAACAAAGAACTCC   |
| <i>ASPARAGINASE</i> | Os04g46370 | AGCCCAGATGAGAATGGTCAAAC  | CCGATTTCCATTGTGGTCCCATC  |
| <i>GS</i>           | Os04g56400 | TGGGTGCCACACAACTACAGC    | GCAAGTCATGGCGAAGTGATAGG  |
| <i>PEPCK3</i>       | Os03g15050 | AGTGGCTACACTGCTCTGGTTG   | TGGAGCATGATGAACGCTGCAC   |
| <i>PEPCK10</i>      | Os10g13700 | TCAGTGGCTACACTGGCATTGGTC | TAGCCTGTGGCTCCTTGATACC   |
| <i>NADP-ME</i>      | Os01g52500 | TGACATGCTTCTTGCAGCTTCG   | GGCCCTTGTCGAAATTCTCTTGTG |

---

---

**Supplementary Table S2.** *Concentration of malate in guttation sap and xylem exudate in 7-d-old rice plants supplied with water (control) or 10 mM L-malate. Values are the mean  $\pm$  SE of three separate sets of 24 plants.*

---

| Treatment | Guttation sap/Xylem exudate | Malate concentration ( $\mu$ M) |
|-----------|-----------------------------|---------------------------------|
| Control   | Guttation sap               | 1.76 $\pm$ 0.09                 |
|           | Xylem exudate               | 40.00 $\pm$ 0.50                |
| Malate    | Guttation sap               | 24.53 $\pm$ 0.13                |
|           | Xylem exudate               | 181 $\pm$ 3                     |

---

**Supplementary Table S3.** Amounts of amino acids in guttation fluid at the tip and xylem exudate both at and various distances from the base in 7-d-old rice plants grown on perlite and supplied with water (control) and water with 350  $\mu\text{M}$  MPA. Values are the mean  $\pm$  SE of three separate sets of 24 plants. Mean guttation and xylem exudate volumes ( $\mu\text{l}$ ) required for conversion to  $\mu\text{M}$  are as follows: control, base to tip; 60, 11.5, 0.2, 41. MPA, 61, 20, 21, 67.

|                      | Amount of amino acids (nmol) |                  |                  |                  |                   |                  |                  |                  |
|----------------------|------------------------------|------------------|------------------|------------------|-------------------|------------------|------------------|------------------|
|                      | Base                         |                  | 1.0 cm           |                  | 2.0 cm            |                  | Tip              |                  |
|                      | Control                      | MPA              | Control          | MPA              | Control           | MPA              | Control          | MPA              |
| Aspartate            | 6.12 $\pm$ 0.54              | 3.66 $\pm$ 0.26  | 0.49 $\pm$ 0.03  | 0.99 $\pm$ 0.08  | 0.003 $\pm$ 0     | 1.15 $\pm$ 0.11  | 0.212 $\pm$ 0    | 0.93 $\pm$ 0.08  |
| Glutamic Acid        | 3.59 $\pm$ 0.25              | 2.35 $\pm$ 0.18  | 0.41 $\pm$ 0.03  | 0.84 $\pm$ 0.05  | 0.002 $\pm$ 0     | 0.82 $\pm$ 0.09  | 0.360 $\pm$ 0.02 | 0.25 $\pm$ 0.15  |
| Asparagine           | 15.24 $\pm$ 1.08             | 27.27 $\pm$ 2.32 | 1.97 $\pm$ 0.18  | 7.20 $\pm$ 0.48  | 0.027 $\pm$ 0     | 1.72 $\pm$ 0.16  | 0.197 $\pm$ 0.01 | 0.54 $\pm$ 0.06  |
| Histidine            | 9.96 $\pm$ 0.60              | 3.78 $\pm$ 0.30  | 0.14 $\pm$ 0.01  | 0.32 $\pm$ 0.01  | 0.001 $\pm$ 0     | 0.35 $\pm$ 0.03  | 0.103 $\pm$ 0.01 | 0.40 $\pm$ 0.03  |
| Serine               | 24.06 $\pm$ 1.38             | 19.76 $\pm$ 1.34 | 1.24 $\pm$ 0.09  | 1.34 $\pm$ 0.09  | 0.009 $\pm$ 0     | 0.88 $\pm$ 0.07  | 0.311 $\pm$ 0.03 | 1.74 $\pm$ 0.12  |
| Glutamine            | 36.72 $\pm$ 3.36             | 88.02 $\pm$ 7.56 | 7.61 $\pm$ 0.52  | 22.56 $\pm$ 2.28 | 0.092 $\pm$ 0.01  | 1.74 $\pm$ 0.13  | 0.043 $\pm$ 0    | 0.32 $\pm$ 0.03  |
| Arginine             | 5.80 $\pm$ 0.31              | 4.84 $\pm$ 0.52  | 0.25 $\pm$ 0.01  | 0.71 $\pm$ 0.06  | 0.002 $\pm$ 0     | 0.53 $\pm$ 0.04  | 0.142 $\pm$ 0.01 | 0.19 $\pm$ 0.02  |
| Glycine              | 12.12 $\pm$ 1.08             | 10.80 $\pm$ 1.10 | 1.07 $\pm$ 0.04  | 1.65 $\pm$ 0.18  | 0.009 $\pm$ 0     | 1.00 $\pm$ 0.12  | 0.378 $\pm$ 0.03 | 3.48 $\pm$ 0.31  |
| Threonine            | 16.74 $\pm$ 1.98             | 6.59 $\pm$ 0.54  | 0.47 $\pm$ 0.05  | 1.36 $\pm$ 0.15  | 0.006 $\pm$ 0     | 1.41 $\pm$ 0.16  | 0.178 $\pm$ 0.02 | 0.67 $\pm$ 0.10  |
| Tyrosine             | 8.88 $\pm$ 0.54              | 3.88 $\pm$ 0.32  | 0.41 $\pm$ 0.02  | 0.53 $\pm$ 0.05  | 0.003 $\pm$ 0     | 0.25 $\pm$ 0.02  | 0.037 $\pm$ 0    | 0.23 $\pm$ 0.02  |
| Alanine              | 6.72 $\pm$ 0.78              | 5.52 $\pm$ 0.54  | 0.82 $\pm$ 0.05  | 1.00 $\pm$ 0.06  | 0.006 $\pm$ 0     | 0.70 $\pm$ 0.06  | 0.282 $\pm$ 0.02 | 0.41 $\pm$ 0.05  |
| GABA                 | 8.34 $\pm$ 0.02              | 3.76 $\pm$ 0.37  | 0.44 $\pm$ 0.03  | 0.66 $\pm$ 0.06  | 0.005 $\pm$ 0     | 0.53 $\pm$ 0.05  | 0.029 $\pm$ 0    | 0.03 $\pm$ 0     |
| Tryptophan           | 0.35 $\pm$ 0.02              | 3.46 $\pm$ 0.27  | 0.04 $\pm$ 0     | 0.24 $\pm$ 0.02  | 0.001 $\pm$ 0     | 0.21 $\pm$ 0     | 0.039 $\pm$ 0    | 0.06 $\pm$ 0.01  |
| Methionine           | 1.14 $\pm$ 0.07              | 1.13 $\pm$ 0.10  | 0.14 $\pm$ 0.01  | 0.18 $\pm$ 0.02  | 0.001 $\pm$ 0     | 0.13 $\pm$ 0.01  | 0.024 $\pm$ 0    | 0.02 $\pm$ 0     |
| Valine               | 26.82 $\pm$ 2.28             | 12.32 $\pm$ 1.10 | 1.81 $\pm$ 0.13  | 0.80 $\pm$ 0.07  | 0.017 $\pm$ 0     | 1.15 $\pm$ 0.12  | 0.157 $\pm$ 0.01 | 0.48 $\pm$ 0.05  |
| Phenylalanine        | 2.49 $\pm$ 0.13              | 2.30 $\pm$ 0.26  | 0.21 $\pm$ 0.01  | 0.33 $\pm$ 0.36  | 0.002 $\pm$ 0     | 0.39 $\pm$ 0.02  | 0.057 $\pm$ 0    | 0.17 $\pm$ 0.01  |
| Isoleucine           | 11.70 $\pm$ 0.96             | 2.26 $\pm$ 0.22  | 1.05 $\pm$ 0.08  | 0.49 $\pm$ 0.04  | 0.012 $\pm$ 0     | 0.28 $\pm$ 0.03  | n.d.             | 0.33 $\pm$ 0.02  |
| Leucine              | 11.22 $\pm$ 0.48             | 12.26 $\pm$ 1.10 | 1.18 $\pm$ 0.13  | 1.75 $\pm$ 0.16  | 0.006 $\pm$ 0     | 1.00 $\pm$ 0.07  | 0.130 $\pm$ 0.01 | 0.21 $\pm$ 0.02  |
| Lysine               | 17.28 $\pm$ 1.86             | 8.30 $\pm$ 0.73  | 0.80 $\pm$ 0.05  | 0.65 $\pm$ 0.51  | 0.004 $\pm$ 0     | 0.66 $\pm$ 0.05  | 0.089 $\pm$ 0.0  | 0.12 $\pm$ 0.07  |
| $\Sigma$ amino acids | 225 $\pm$ 18                 | 222 $\pm$ 19     | 20.54 $\pm$ 1.48 | 43.58 $\pm$ 4.76 | 0.2069 $\pm$ 0.02 | 14.91 $\pm$ 1.34 | 2.77 $\pm$ 0.20  | 10.60 $\pm$ 1.14 |

**Supplementary Table S4.** Amounts of amino acids in guttation fluid at the tip and xylem exudate both at and various distances from the base in 7-d-old rice plants grown on perlite and supplied with 10 mM Asn and Asn with 350  $\mu$ M MPA. Values are the mean  $\pm$  SE of three separate sets of 24 plants. Mean guttation and xylem exudate volumes ( $\mu$ l) required for conversion to  $\mu$ M are as follows: Asn, base to tip; 140, 111, 62, 103. Asn +MPA, 130, 92, 95, 96.

|                      | Amount of amino acids (nmol) |                  |                  |                   |                  |                  |                  |                  |
|----------------------|------------------------------|------------------|------------------|-------------------|------------------|------------------|------------------|------------------|
|                      | Base                         |                  | 1.0 cm           |                   | 2.0 cm           |                  | Tip              |                  |
|                      | Asn                          | MPA              | Asn              | MPA               | Asn              | MPA              | Asn              | MPA              |
| Aspartate            | 28.42 $\pm$ 3.08             | 33.15 $\pm$ 2.86 | 29.64 $\pm$ 1.44 | 25.67 $\pm$ 2.02  | 6.45 $\pm$ 0.68  | 17.86 $\pm$ 1.99 | 4.65 $\pm$ 0.32  | 10.85 $\pm$ 0.77 |
| Glutamic Acid        | 26.60 $\pm$ 2.38             | 23.40 $\pm$ 2.47 | 24.20 $\pm$ 1.11 | 17.11 $\pm$ 27.33 | 9.49 $\pm$ 0.87  | 15.30 $\pm$ 0.76 | 9.41 $\pm$ 1.03  | 9.89 $\pm$ 0.48  |
| Asparagine           | 2039 $\pm$ 143               | 2377 $\pm$ 217   | 1040 $\pm$ 80.03 | 1110 $\pm$ 163    | 493 $\pm$ 34.84  | 832 $\pm$ 84.08  | 140 $\pm$ 14.52  | 227 $\pm$ 23.14  |
| Histidine            | 30.24 $\pm$ 0.98             | 23.66 $\pm$ 2.21 | 17.98 $\pm$ 1.55 | 15.18 $\pm$ 14.11 | 4.92 $\pm$ 0.41  | 11.97 $\pm$ 1.14 | 2.08 $\pm$ 0.20  | 5.93 $\pm$ 0.50  |
| Serine               | 199 $\pm$ 16.94              | 168 $\pm$ 14.69  | 102 $\pm$ 7.99   | 145 $\pm$ 95.21   | 40.24 $\pm$ 0.43 | 76.10 $\pm$ 6.84 | 15.97 $\pm$ 1.65 | 31.10 $\pm$ 2.69 |
| Glutamine            | 1820 $\pm$ 111               | 2093 $\pm$ 202   | 1142 $\pm$ 110   | 1155 $\pm$ 609    | 564 $\pm$ 35.07  | 794 $\pm$ 77.05  | 173 $\pm$ 14.83  | 305 $\pm$ 3.17   |
| Arginine             | 55.58 $\pm$ 3.36             | 40.82 $\pm$ 2.86 | 34.41 $\pm$ 2.44 | 30.54 $\pm$ 10.22 | 8.56 $\pm$ 0.68  | 26.41 $\pm$ 2.38 | 3.18 $\pm$ 0.23  | 8.99 $\pm$ 0.85  |
| Glycine              | 117 $\pm$ 10.18              | 71.89 $\pm$ 4.03 | 51.95 $\pm$ 3.11 | 127 $\pm$ 70.55   | 19.59 $\pm$ 1.74 | 47.22 $\pm$ 4.09 | 7.16 $\pm$ 0.57  | 16.99 $\pm$ 1.34 |
| Threonine            | 83.16 $\pm$ 8.82             | 65.65 $\pm$ 5.85 | 36.30 $\pm$ 3.77 | 41.31 $\pm$ 28.77 | 8.00 $\pm$ 0.87  | 19.10 $\pm$ 2.38 | 7.34 $\pm$ 0.60  | 10.94 $\pm$ 1.15 |
| Tyrosine             | 23.66 $\pm$ 1.54             | 27.56 $\pm$ 1.43 | 16.32 $\pm$ 1.22 | 19.96 $\pm$ 18.76 | 7.19 $\pm$ 0.62  | 15.58 $\pm$ 1.62 | 4.33 $\pm$ 0.40  | 7.09 $\pm$ 0.54  |
| Alanine              | 157 $\pm$ 12.46              | 123 $\pm$ 9.88   | 90.80 $\pm$ 8.10 | 83.26 $\pm$ 40.21 | 37.20 $\pm$ 2.79 | 63.56 $\pm$ 5.51 | 9.06 $\pm$ 0.81  | 21.50 $\pm$ 1.73 |
| GABA                 | 27.16 $\pm$ 2.94             | 20.93 $\pm$ 1.56 | 16.54 $\pm$ 1.78 | 14.08 $\pm$ 22.45 | 6.82 $\pm$ 0.50  | 11.50 $\pm$ 0.95 | 1.52 $\pm$ 0.14  | 2.70 $\pm$ 0.17  |
| Tryptophan           | 10.84 $\pm$ 0.73             | 37.31 $\pm$ 4.03 | 12.77 $\pm$ 1.00 | 20.5 2 $\pm$ 0    | 0.13 $\pm$ 0.01  | 1.07 $\pm$ 0.11  | n.d.             | 0.48 $\pm$ 0.05  |
| Methionine           | 8.64 $\pm$ 0.60              | 9.05 $\pm$ 0.94  | 11.21 $\pm$ 0.89 | 5.79 $\pm$ 4.22   | 2.10 $\pm$ 0.25  | 6.96 $\pm$ 0.05  | 0.94 $\pm$ 0.01  | 2.18 $\pm$ 0.18  |
| Valine               | 92.68 $\pm$ 7.14             | 70.59 $\pm$ 6.89 | 65.93 $\pm$ 6.88 | 48.39 $\pm$ 81.17 | 26.85 $\pm$ 2.36 | 47.98 $\pm$ 3.90 | 12.26 $\pm$ 1.24 | 18.05 $\pm$ 1.54 |
| Phenylalanine        | 26.32 $\pm$ 1.54             | 21.71 $\pm$ 1.95 | 21.98 $\pm$ 1.33 | 14.26 $\pm$ 0     | 5.59 $\pm$ 0.61  | 11.21 $\pm$ 1.05 | n.d.             | 1.33 $\pm$ 0.12  |
| Isoleucine           | 16.94 $\pm$ 1.26             | 16.12 $\pm$ 1.69 | 9.61 $\pm$ 0.62  | 9.84 $\pm$ 47.81  | 3.83 $\pm$ 0.32  | 11.40 $\pm$ 0.76 | 1.61 $\pm$ 0.17  | 3.22 $\pm$ 0.39  |
| Leucine              | 77.70 $\pm$ 8.54             | 79.95 $\pm$ 6.63 | 52.06 $\pm$ 4.66 | 50.88 $\pm$ 33.53 | 21.14 $\pm$ 1.74 | 48.17 $\pm$ 2.76 | 7.63 $\pm$ 0.82  | 13.63 $\pm$ 1.15 |
| Lysine               | 59.92 $\pm$ 3.64             | 40.43 $\pm$ 3.64 | 38.41 $\pm$ 3.55 | 28.98 $\pm$ 25.89 | 15.13 $\pm$ 1.61 | 27.55 $\pm$ 2.95 | 3.98 $\pm$ 0.33  | 6.94 $\pm$ 0.62  |
| $\Sigma$ amino acids | 4900 $\pm$ 340               | 5343 $\pm$ 492   | 2813 $\pm$ 241   | 2963 $\pm$ 250    | 1280 $\pm$ 86    | 2085 $\pm$ 200   | 404 $\pm$ 38     | 704 $\pm$ 41     |

### Transgenic plant isolation and copy number analysis

*Primary isolation of transgenic plants.* T<sub>2</sub> seeds of TRIM line M0035095 (Chromosome Os03g15050; supplied by the Institute of Plant and Microbial Biology, Academia Sinica, Taipei, Taiwan) were grown in compost as described in Materials and Methods. At 5 weeks the fifth leaf from the first tiller was harvested. DNA was extracted using a DNeasy Plant Mini Kit (Qiagen, Crawley, UK). 11.5 µl of DNA was mixed with 12.5 µl of BioMix Red (Bioline, London, UK) and 0.5 µM of each primer (see table below). PCR was done at 95°C for 5 min; then 95°C (15 s), 57°C (2 min), 72°C (1min 30 s), for 35 cycles and 72°C for 5 min. Plants were genotyped according to product fragments obtained on a 1% (w/v) agarose ethidium bromide stained gel and the ratio of each genotype noted. Seed was collected from each plant genotype and stored for further use.

---

#### Supplementary Table S5. Primers used for genotyping.

*Sequences of primers used for genotyping of T<sub>2</sub> (above) and T<sub>3</sub> (Table 3) plants.*

---

| Gene                             | Left Primer          | Right Primer         | Border Primer        |
|----------------------------------|----------------------|----------------------|----------------------|
| PEPCK 3<br>TRIM line<br>M0035095 | TACGATTTACGACCCGGTTC | TCCTGTTGAAAAGCAGGAGC | ACTCATGGCGATCTCTTACC |

---

*PCR of T<sub>3</sub> plants (from single selfed heterozygous T<sub>2</sub> transgenic plants) used in amino acid and guttation fluid measurements.* DNA was extracted from 7-d-old plants grown and analysed as described above for T<sub>2</sub> seedlings. Amino acid analysis was done as detailed in Materials and Methods on guttation fluid from pooled plants confirmed by PCR to be wild-type, heterozygote or homozygote. Copy number was determined from the isolated DNA (IDna Genetics Ltd., The John Innes Centre, Norwich) using methodology detailed in Bartlett *et al.*, (2008) and standard hygromycin gene primers (Table S6).

---

**Supplementary Table S6.** *Primers used for copy number determination.*

*Sequences of primers used for copy number determination of plants described in Table 3.*

---

| Gene       | HvHygP Probe Primer                | HvHygF3<br>Forward Primer | HvHygR2<br>Reverse Primer |
|------------|------------------------------------|---------------------------|---------------------------|
| <i>Hyg</i> | Fam-CAGCGGTCATTGACTGGAGCGAGG-tamra | GGATTTCGGCTCCAACAATG      | TATTGGGAATCCCCGAACATC     |

---

*RTq-PCR.* Quantitative PCR was done as detailed in the main Materials and Methods section using RNA from the transgenic TRIM line rice plants. Expression of the target gene *PEPCK3* was normalized to *Glutaredoxin*. The sequences of primers used are shown in Table S7.

---

**Supplementary Table S7.** *Primers used for gene expression.*

*Sequences of primers used for relative gene expression described in Table 3. Target gene PEPCK3 was normalised to the Glutaredoxin gene.*

---

| Gene                | Chromosome | Forward Primer         | Reverse Primer          |
|---------------------|------------|------------------------|-------------------------|
| <i>Glutaredoxin</i> | Os04g42930 | TGTTCGAGCAGCTTGGAGCAAC | ACTGCAGCTCAGATCCATCACTC |
| <i>PEPCK3</i>       | Os03g15050 | AGTGGCTACACTGCTCTGGTTG | TGGAGCATGATGAACGCTGCAC  |

---
